# Supplementary material
Source: MDPI journal article supplement (https://www.mdpi.com/1999-4907/9/4/223)
Supplement: s1 [file s1]

# ACMECS Bioenergy 2015 Workshop Survey

## INTRODUCTION

The ACMECS bioenergy network was initiated during the first ACMECS bioenergy workshop held in Bangkok in 2013, following several years of informal collaboration on bioenergy development in the member countries Cambodia, Lao PDR, Myanmar, Thailand and Vietnam. The aim of the network is to enhance collaboration in the fields of scientific research, technology transfer and markets development within and beyond the ACMECS countries while ensuring sustainability in environment, social issues and economy. The first workshop in 2013 established the official network and provided an overview of the current status of bioenergy use and development in each country. During the subsequent workshop held in Bangkok in 2014, the implementation of the identified core areas of collaboration was discussed and negotiation results led to the establishment of core groups in each country, comprising of not more than three members, while ideally one of them is appointed from the respective ministry responsible for energy issues. It was moreover agreed that these core groups develop a national bioenergy plan. The country core groups met in September, 2015 in Pattaya, Thailand to finalize and discuss the drafts of the national bioenergy development plans. These were presented during the 3rd ACMECS bioenergy workshop held in Ubon Ratchathani, Thailand in December 2015.

## AIM OF THIS QUESTIONNAIRE

The following questions are intended to provide the network coordinator with additional information to the presented national bioenergy development plans. Especially the participant's expectations and anticipated outcomes in view of the national bioenergy development plans are of high relevance to the organizers who will apply for further funding to continue the process of the network setup. The proposed next step will include the integration of the national plants to formulate a regional ACMECS bioenergy strategy. As there are numerous expectations and concerns involved that are not necessarily compatible to each other, it is necessary to gain insight of the current opinions of stakeholders responsible for the network setup. Since you will answer these questions from your own perspective, it is possible that your views may differ from others or from official positions. While we would prefer to be able to follow-up with you on some of your responses, we also recognize that you may wish to remain anonymous. Please provide as much information about yourself as you can while still remaining comfortable. This will help us to better understand the regional picture.

## DISCLAIMER

The information collected by this questionnaire is treated confidential and will remain within the coordination office. Data will only be published in aggregated form on country or institution category basis, the response of individuals will not be published in any way. The name and contact information is therefore optional, as we might need to clarify certain answers which can be helpful in certain cases.

\* Required

## 1. Personal information

Please provide your name and your email address here, so we can contact you in case of any further clarifications. If you would like to remain anonymous, you DO NOT NEED TO PROVIDE your name and your Email address!

### 1. 1.1 Name

---

### 2. 1.2 Email

---

3. 1.3 Which country do you represent within the ACMECS network?

Mark only one oval.

- Cambodia
- Lao PDR
- Myanmar
- Thailand
- Vietnam

4. 1.4 Which type of organization best describes your host institution where you are employed? \*

Mark only one oval.

- Government institution (policy-making)
- Non-Governmental Organization (NGO)
- University or Research Institute
- Consulting company or private biomass/energy company

## 2. Current bioenergy situation in your country

Please provide information on the current situation of bioenergy development in your country

5. 2.1 Please rank the following biomass feedstocks according to their importance in your country for the sector PRIVATE HOUSEHOLDS \*

Mark only one oval per row.

|                 | Very important        | Important             | Occasionally used     | Never used            |
|-----------------|-----------------------|-----------------------|-----------------------|-----------------------|
| Fuelwood        | <input type="radio"/> | <input type="radio"/> | <input type="radio"/> | <input type="radio"/> |
| Wood charcoal   | <input type="radio"/> | <input type="radio"/> | <input type="radio"/> | <input type="radio"/> |
| Woodchips       | <input type="radio"/> | <input type="radio"/> | <input type="radio"/> | <input type="radio"/> |
| Pellets         | <input type="radio"/> | <input type="radio"/> | <input type="radio"/> | <input type="radio"/> |
| Liquid biofuels | <input type="radio"/> | <input type="radio"/> | <input type="radio"/> | <input type="radio"/> |
| other           | <input type="radio"/> | <input type="radio"/> | <input type="radio"/> | <input type="radio"/> |

6. 2.1.1 specify "other" if applicable

\_\_\_\_\_

7. 2.2 Please rank the following biomass feedstocks according to their importance in your country for the sector INDUSTRY \*

Mark only one oval per row.

|                 | Very important        | Important             | Occasionally used     | Never used            |
|-----------------|-----------------------|-----------------------|-----------------------|-----------------------|
| Fuelwood        | <input type="radio"/> | <input type="radio"/> | <input type="radio"/> | <input type="radio"/> |
| Wood charcoal   | <input type="radio"/> | <input type="radio"/> | <input type="radio"/> | <input type="radio"/> |
| Woodchips       | <input type="radio"/> | <input type="radio"/> | <input type="radio"/> | <input type="radio"/> |
| Pellets         | <input type="radio"/> | <input type="radio"/> | <input type="radio"/> | <input type="radio"/> |
| Liquid biofuels | <input type="radio"/> | <input type="radio"/> | <input type="radio"/> | <input type="radio"/> |
| other           | <input type="radio"/> | <input type="radio"/> | <input type="radio"/> | <input type="radio"/> |

8. 2.2.1 specify "other" if applicable

\_\_\_\_\_

**9. 2.3 Please estimate the share of NATURAL FORESTS in the total provision (all sectors combined) of biomass in your country \***

*Mark only one oval.*

- 0-10%
- 10-20%
- 20-30%
- 30-40%
- 40-50%
- 50-60%
- 60-70%
- 70-80%
- 80-90%
- 90-100%

**10. 2.4 Please estimate the share of FOREST PLANTATIONS in the total provision (all sectors combined) of biomass in your country \***

*Mark only one oval.*

- 0-10%
- 10-20%
- 20-30%
- 30-40%
- 40-50%
- 50-60%
- 60-70%
- 70-80%
- 80-90%
- 90-100%

**11. 2.5 Please estimate the share of AGRICULTURE in the total provision (all sectors combined) of biomass in your country \***

*Mark only one oval.*

- 0-10%
- 10-20%
- 20-30%
- 30-40%
- 40-50%
- 50-60%
- 60-70%
- 70-80%
- 80-90%
- 90-100%

12. **2.6 Is there any existing institutional infrastructure for the policy development in the biomass sector? If yes, who is responsible? List the institution[s] or official stakeholders involved in your country (e.g. ministry of energy etc...)** \*

---



---



---



---



---

13. **2.7 Who is responsible for land use decisions at local scales? Describe by land ownership (example: private land = ..., government land=..., community land=...)** \*

---



---



---



---



---

### 3. Most likely FUTURE bioenergy situation in your country in 25 years from now

Please describe here how the future situation in 25 years from now will be in your country. This should be done from your point of view considering your expertise and experience in your country.

14. **3.1 Please rank the following biomass feedstocks according to their importance in your country for the sector PRIVATE HOUSEHOLDS in 25 years from now** \*

*Mark only one oval per row.*

|                 | Very important        | Important             | Occasionally used     | Never used            |
|-----------------|-----------------------|-----------------------|-----------------------|-----------------------|
| Fuelwood        | <input type="radio"/> | <input type="radio"/> | <input type="radio"/> | <input type="radio"/> |
| Wood charcoal   | <input type="radio"/> | <input type="radio"/> | <input type="radio"/> | <input type="radio"/> |
| Woodchips       | <input type="radio"/> | <input type="radio"/> | <input type="radio"/> | <input type="radio"/> |
| Pellets         | <input type="radio"/> | <input type="radio"/> | <input type="radio"/> | <input type="radio"/> |
| Liquid biofuels | <input type="radio"/> | <input type="radio"/> | <input type="radio"/> | <input type="radio"/> |
| other           | <input type="radio"/> | <input type="radio"/> | <input type="radio"/> | <input type="radio"/> |

15. **3.1.1 specify "other" if applicable**

---

16. **3.2 Please rank the following biomass feedstocks according to their importance in your country for the sector INDUSTRY in 25 years from now** \*

*Mark only one oval per row.*

|                 | Very important        | Important             | Occasionally used     | Never used            |
|-----------------|-----------------------|-----------------------|-----------------------|-----------------------|
| Fuelwood        | <input type="radio"/> | <input type="radio"/> | <input type="radio"/> | <input type="radio"/> |
| Wood charcoal   | <input type="radio"/> | <input type="radio"/> | <input type="radio"/> | <input type="radio"/> |
| Woodchips       | <input type="radio"/> | <input type="radio"/> | <input type="radio"/> | <input type="radio"/> |
| Pellets         | <input type="radio"/> | <input type="radio"/> | <input type="radio"/> | <input type="radio"/> |
| Liquid biofuels | <input type="radio"/> | <input type="radio"/> | <input type="radio"/> | <input type="radio"/> |
| other           | <input type="radio"/> | <input type="radio"/> | <input type="radio"/> | <input type="radio"/> |

17. 3.2.1 specify "other" if applicable

---

18. 3.3 Please estimate the likely share of NATURAL FORESTS in the total provision (all sectors combined) of biomass in your country in 25 years \*

Mark only one oval.

- 0-10%
- 10-20%
- 20-30%
- 30-40%
- 40-50%
- 50-60%
- 60-70%
- 70-80%
- 80-90%
- 90-100%

19. 3.4 Please estimate the likely share of FOREST PLANTATIONS in the total provision (all sectors combined) of biomass in your country in 25 years \*

Mark only one oval.

- 0-10%
- 10-20%
- 20-30%
- 30-40%
- 40-50%
- 50-60%
- 60-70%
- 70-80%
- 80-90%
- 90-100%

20. 3.5 Please estimate the likely share of AGRICULTURE in the total provision (all sectors combined) of biomass in your country in 25 years \*

Mark only one oval.

- 0-10%
- 10-20%
- 20-30%
- 30-40%
- 40-50%
- 50-60%
- 60-70%
- 70-80%
- 80-90%
- 90-100%

21. **3.6 In 25 years time, who should be responsible for policy development in the biomass sector? List the institution[s] or official stakeholders, which would be most efficient to handle this in your country? \***

---



---



---



---



---

22. **3.7 Who should be responsible for land use decisions at local scales in 25 years? Describe by land ownership (example: private land = ..., government land=..., community land=...) \***

---



---



---



---



---

#### 4. Your expectations in the ACMECS bioenergy network

Here we would like to know what you personally are expecting from the ACMECS bioenergy network

23. **4.1 Please rate for each option where the proposed ACMEC bioenergy network should have an impact in your opinion \***

*Mark only one oval per row.*

|                                                   | Very important        | Important             | Should have an impact | Unimportant           |
|---------------------------------------------------|-----------------------|-----------------------|-----------------------|-----------------------|
| Income generation for local communities           | <input type="radio"/> | <input type="radio"/> | <input type="radio"/> | <input type="radio"/> |
| Improvement of access to energy to the population | <input type="radio"/> | <input type="radio"/> | <input type="radio"/> | <input type="radio"/> |
| Technology transfer                               | <input type="radio"/> | <input type="radio"/> | <input type="radio"/> | <input type="radio"/> |
| Reduced dependence of fossil fuel imports         | <input type="radio"/> | <input type="radio"/> | <input type="radio"/> | <input type="radio"/> |
| Foreign investments                               | <input type="radio"/> | <input type="radio"/> | <input type="radio"/> | <input type="radio"/> |
| National investments                              | <input type="radio"/> | <input type="radio"/> | <input type="radio"/> | <input type="radio"/> |
| Sustainable use of natural resources              | <input type="radio"/> | <input type="radio"/> | <input type="radio"/> | <input type="radio"/> |
| Climate change mitigation/adaptation              | <input type="radio"/> | <input type="radio"/> | <input type="radio"/> | <input type="radio"/> |

24. **4.1.1 Do you have another issue where the network should have an impact that is important for you in addition to the ones mentioned above?**

---

#### 5. Which efforts are needed at the moment in your point of view?

In this section, we would like to know in detail what is needed now in order to implement an efficient network structure and the national bioenergy plans

25. **5.1 What is most needed at this point in order to implement an efficient network structure that ensures a benefit for each country in the ACMECS region in terms of bioenergy development? \***

*Mark only one oval per row.*

|                                                                                                                              | Extremely needed      | Needed                | Would be nice but not essential | Not needed            |
|------------------------------------------------------------------------------------------------------------------------------|-----------------------|-----------------------|---------------------------------|-----------------------|
| Skilled human capital                                                                                                        | <input type="radio"/> | <input type="radio"/> | <input type="radio"/>           | <input type="radio"/> |
| Data on biomass market supply                                                                                                | <input type="radio"/> | <input type="radio"/> | <input type="radio"/>           | <input type="radio"/> |
| Government support for community involvement (e.g. biomass production and marketing collaboratives, community forestry etc.) | <input type="radio"/> | <input type="radio"/> | <input type="radio"/>           | <input type="radio"/> |
| Biomass availability on spatial scales                                                                                       | <input type="radio"/> | <input type="radio"/> | <input type="radio"/>           | <input type="radio"/> |
| Data on biomass production constraints                                                                                       | <input type="radio"/> | <input type="radio"/> | <input type="radio"/>           | <input type="radio"/> |
| Support in planning of renewable energy systems                                                                              | <input type="radio"/> | <input type="radio"/> | <input type="radio"/>           | <input type="radio"/> |
| Collaboration among ACMECS countries                                                                                         | <input type="radio"/> | <input type="radio"/> | <input type="radio"/>           | <input type="radio"/> |
| Access to capital/investments                                                                                                | <input type="radio"/> | <input type="radio"/> | <input type="radio"/>           | <input type="radio"/> |
| Biomass potentials on spatial scales                                                                                         | <input type="radio"/> | <input type="radio"/> | <input type="radio"/>           | <input type="radio"/> |
| Biomass inventory data                                                                                                       | <input type="radio"/> | <input type="radio"/> | <input type="radio"/>           | <input type="radio"/> |
| Governmental incentives (taxation, subsidies)                                                                                | <input type="radio"/> | <input type="radio"/> | <input type="radio"/>           | <input type="radio"/> |
| Public acceptance for such a network                                                                                         | <input type="radio"/> | <input type="radio"/> | <input type="radio"/>           | <input type="radio"/> |
| Collaboration among national institutions                                                                                    | <input type="radio"/> | <input type="radio"/> | <input type="radio"/>           | <input type="radio"/> |
| International collaboration                                                                                                  | <input type="radio"/> | <input type="radio"/> | <input type="radio"/>           | <input type="radio"/> |
| Soil data (spatially explicit)                                                                                               | <input type="radio"/> | <input type="radio"/> | <input type="radio"/>           | <input type="radio"/> |
| Supporting data on land use                                                                                                  | <input type="radio"/> | <input type="radio"/> | <input type="radio"/>           | <input type="radio"/> |
| Political commitment to bioenergy                                                                                            | <input type="radio"/> | <input type="radio"/> | <input type="radio"/>           | <input type="radio"/> |
| Education (capacity building)                                                                                                | <input type="radio"/> | <input type="radio"/> | <input type="radio"/>           | <input type="radio"/> |





30. **6.3 Climate Change** \*

Mark only one oval.

|                 |                       |                       |                       |                       |                       |               |
|-----------------|-----------------------|-----------------------|-----------------------|-----------------------|-----------------------|---------------|
|                 | 1                     | 2                     | 3                     | 4                     | 5                     |               |
| unlikely a risk | <input type="radio"/> | likely a risk |

31. **6.4 Market (price) fluctuations** \*

Mark only one oval.

|                 |                       |                       |                       |                       |                       |               |
|-----------------|-----------------------|-----------------------|-----------------------|-----------------------|-----------------------|---------------|
|                 | 1                     | 2                     | 3                     | 4                     | 5                     |               |
| unlikely a risk | <input type="radio"/> | likely a risk |

32. **6.5 Crop insurance (Crop failures due to pests or diseases)** \*

Mark only one oval.

|                 |                       |                       |                       |                       |                       |               |
|-----------------|-----------------------|-----------------------|-----------------------|-----------------------|-----------------------|---------------|
|                 | 1                     | 2                     | 3                     | 4                     | 5                     |               |
| unlikely a risk | <input type="radio"/> | likely a risk |

33. **6.6. Degradation of natural resources (e.g. water, soils etc.)** \*

Mark only one oval.

|                 |                       |                       |                       |                       |                       |               |
|-----------------|-----------------------|-----------------------|-----------------------|-----------------------|-----------------------|---------------|
|                 | 1                     | 2                     | 3                     | 4                     | 5                     |               |
| unlikely a risk | <input type="radio"/> | likely a risk |

## 7. Markets, standardization and certification

34. **7.1 Biomass produced in your country might be sold on domestic, regional or international markets. How important are the following markets today?** \*

Mark only one oval per row.

|                                    | Extremely important   | Very important        | Important             | Not important         |
|------------------------------------|-----------------------|-----------------------|-----------------------|-----------------------|
| International market               | <input type="radio"/> | <input type="radio"/> | <input type="radio"/> | <input type="radio"/> |
| Domestic market                    | <input type="radio"/> | <input type="radio"/> | <input type="radio"/> | <input type="radio"/> |
| Regional market (ACMECS countries) | <input type="radio"/> | <input type="radio"/> | <input type="radio"/> | <input type="radio"/> |

35. **7.2 Biomass produced in your country might be sold on domestic or international markets (including other ACMECS countries). How important are the following markets in 25 years?** \*

Mark only one oval per row.

|                                    | Extremely important   | Very important        | Important             | Not important         |
|------------------------------------|-----------------------|-----------------------|-----------------------|-----------------------|
| Domestic market                    | <input type="radio"/> | <input type="radio"/> | <input type="radio"/> | <input type="radio"/> |
| Regional market (ACMECS countries) | <input type="radio"/> | <input type="radio"/> | <input type="radio"/> | <input type="radio"/> |
| International market               | <input type="radio"/> | <input type="radio"/> | <input type="radio"/> | <input type="radio"/> |

36. 7.3 One of the issues discussed during the workshop was the creation of physical and chemical standards to promote markets. For the following biomass commodities, please indicate the importance of national biomass quality standards. Please note: we are asking for NATIONAL standards, NOT FSC, PEFC etc...

Mark only one oval per row.

|                                         | Very important        | Important             | Good to have          | Unimportant           |
|-----------------------------------------|-----------------------|-----------------------|-----------------------|-----------------------|
| Residuals from sawmills (e.g. cut-offs) | <input type="radio"/> | <input type="radio"/> | <input type="radio"/> | <input type="radio"/> |
| other... please specify below           | <input type="radio"/> | <input type="radio"/> | <input type="radio"/> | <input type="radio"/> |
| Charcoal                                | <input type="radio"/> | <input type="radio"/> | <input type="radio"/> | <input type="radio"/> |
| Sawdust                                 | <input type="radio"/> | <input type="radio"/> | <input type="radio"/> | <input type="radio"/> |
| Woodchips                               | <input type="radio"/> | <input type="radio"/> | <input type="radio"/> | <input type="radio"/> |
| Pellets                                 | <input type="radio"/> | <input type="radio"/> | <input type="radio"/> | <input type="radio"/> |
| Briquettes                              | <input type="radio"/> | <input type="radio"/> | <input type="radio"/> | <input type="radio"/> |

37. 7.3.1 Please specify other (if applicable)

---



---



---



---



---

38. 7.4 How important are certification systems to generate trust on the markets and ensure sustainable biomass production? \*

Mark only one oval per row.

|                                                             | Very important        | Important             | Good to have          | Unimportant           |
|-------------------------------------------------------------|-----------------------|-----------------------|-----------------------|-----------------------|
| Regional (ACMECS) standards defined by the proposed network | <input type="radio"/> | <input type="radio"/> | <input type="radio"/> | <input type="radio"/> |
| National certification systems developed independently      | <input type="radio"/> | <input type="radio"/> | <input type="radio"/> | <input type="radio"/> |
| International certification systems (e.g. FSC)              | <input type="radio"/> | <input type="radio"/> | <input type="radio"/> | <input type="radio"/> |

39. 7.5 Is there anything else you would like to tell us regarding markets, standards and certification?

---



---



---



---



---

## 8. Financial instruments

40. **8.1 How important are the following financial instruments to promote a sustainable bioenergy development in the ACMECS region from your perspective in the SHORT-TERM ? \***

Mark only one oval per row.

|                                                                                 | Very important        | Important             | Can be useful         | Not important         |
|---------------------------------------------------------------------------------|-----------------------|-----------------------|-----------------------|-----------------------|
| Development banks<br>(Governmental institutions with specific development aims) | <input type="radio"/> | <input type="radio"/> | <input type="radio"/> | <input type="radio"/> |
| Private corporations                                                            | <input type="radio"/> | <input type="radio"/> | <input type="radio"/> | <input type="radio"/> |
| International large-scale investors                                             | <input type="radio"/> | <input type="radio"/> | <input type="radio"/> | <input type="radio"/> |
| NGO's                                                                           | <input type="radio"/> | <input type="radio"/> | <input type="radio"/> | <input type="radio"/> |
| Commercial banks                                                                | <input type="radio"/> | <input type="radio"/> | <input type="radio"/> | <input type="radio"/> |
| REDD+                                                                           | <input type="radio"/> | <input type="radio"/> | <input type="radio"/> | <input type="radio"/> |
| Small-scale and microcredit models                                              | <input type="radio"/> | <input type="radio"/> | <input type="radio"/> | <input type="radio"/> |

41. **8.1.1 Are there any other instruments we are missing and how important are they?**

---



---



---



---



---

42. **8.2 How important are the following financial instruments to promote a sustainable bioenergy development in the ACMECS region from your perspective in the LONG-TERM ? \***

Mark only one oval per row.

|                                     | Very important        | Important             | Can be useful         | Not important         |
|-------------------------------------|-----------------------|-----------------------|-----------------------|-----------------------|
| Small-scale and microcredit models  | <input type="radio"/> | <input type="radio"/> | <input type="radio"/> | <input type="radio"/> |
| NGO's                               | <input type="radio"/> | <input type="radio"/> | <input type="radio"/> | <input type="radio"/> |
| REDD+                               | <input type="radio"/> | <input type="radio"/> | <input type="radio"/> | <input type="radio"/> |
| Commercial banks                    | <input type="radio"/> | <input type="radio"/> | <input type="radio"/> | <input type="radio"/> |
| International large-scale investors | <input type="radio"/> | <input type="radio"/> | <input type="radio"/> | <input type="radio"/> |
| Development banks                   | <input type="radio"/> | <input type="radio"/> | <input type="radio"/> | <input type="radio"/> |
| Private corporations                | <input type="radio"/> | <input type="radio"/> | <input type="radio"/> | <input type="radio"/> |

43. **8.2.1 Are there any other instruments we are missing and how important are they?**

---



---



---



---



---

## 9. We are almost done

Thank you very much for your time and your valuable input! Maybe you have other comments and/or suggestions, and we are also very keen to get them from you.

44. 9.1 Is there anything else you want to tell us? Please provide us your feedback here, thank you!

---

---

---

---

---
